# Supplementary material
Source: HighWire-hosted journal article supplement (https://www.annfammed.org/highwire/filestream/7401/field_highwire_adjunct_files/0/TorchiaHypothyr_Online_RecStat-rev.pdf)
Supplement: TorchiaHypothyr_Online_RecStat-rev.pdf [file TorchiaHypothyr_Online_RecStat-rev.pdf]

# ANNALS OF FAMILY MEDICINE

## Online Supplementary Material

US Preventive Services Task Force. Screening for congenital hypothyroidism: US Preventive Services Task Force reaffirmation recommendation statement. *Ann Fam Med*. 2008;6(2):166.

<http://www.annfammed.org/cgi/content/full/6/2/166-a/DC1>

---

## Screening for Congenital Hypothyroidism: US Preventive Services Task Force Reaffirmation Recommendation Statement

*US Preventive Services Task Force*

### **CORRESPONDING AUTHOR**

Ned Calonge, MD, MPH  
Chair, US Preventive Services Task Force  
c/o Program Director, USPSTF  
Agency for Healthcare Research and Quality  
540 Gaither Rd  
Rockville, MD 20850  
uspstf@ahrq.gov

- The US Preventive Services Task Force (USPSTF) makes recommendations about preventive care services for patients without recognized signs or symptoms of the target condition.
- Recommendations are based on a systematic review of the evidence of the benefits and harms and an assessment of the net benefit of the service.
- The USPSTF recognizes that clinical or policy decisions involve more considerations than this body of evidence alone. Clinicians and policy-makers should understand the evidence but individualize decision-making to the specific patient or situation.

## **SUMMARY OF RECOMMENDATION & EVIDENCE**

The US Preventive Services Task Force (USPSTF) recommends screening for congenital hypothyroidism (CH) in newborns. (This is a grade "A" recommendation.)

## **RATIONALE**

### **Importance**

Primary congenital hypothyroidism occurs in approximately 1 of every 3,000-4,000 newborns in the United States. In the absence of prompt diagnosis and treatment, most persons with this disorder will develop various degrees of neurological, motor and growth deficits, including irreversible mental retardation.

### **Detection**

In the US, most state-based screening programs utilize serum thyroxine (T<sub>4</sub>) and/or thyroid-stimulating hormone (TSH) performed on capillary blood collected from a heel stick and adsorbed onto filter paper.

### **Benefits of Detection and Early Intervention**

Early detection of CH by neonatal screening and appropriate treatment substantially improves neurodevelopmental outcomes for affected persons.

### **Harms of Detection and Early Treatment**

Positive test results, whether true positive or false positive, cause anxiety in parents. For some parents, this anxiety may be considerable.

### **USPSTF Assessment**

The USPSTF concludes that there is high certainty that the net benefit of screening for congenital hypothyroidism in newborns is substantial.

## **CLINICAL CONSIDERATIONS**

### **Patient Population Under Consideration**

This recommendation applies to all infants born in the US. Premature, very low birth weight and ill infants may benefit from additional screening because these conditions are associated with decreased sensitivity and specificity of screening tests.

### **Screening Tests**

Screening for CH is mandated in all 50 states and the District of Columbia, though methods of screening vary. There are two main methods used in the US: Primary TSH with backup T<sub>4</sub>; and primary T<sub>4</sub> with backup TSH. A few states use both tests in initial screening.<sup>1,2</sup> Clinicians should become familiar with the tests used in their area and the limitations of the employed screening strategy. For example, a primary TSH method may be falsely negative in low and very low birth weight infants with CH because of delayed elevation in TSH. Additionally, few states currently screen for centrally-mediated congenital hypothyroidism. Families should be provided with appropriate information about newborn screening tests, including the benefits and harms of screening. They should be aware of the potential of a false positive test, and the process required for definitive testing. Nationally, only 1 in 25 positive screening tests are confirmed to be CH.<sup>1</sup> Normal newborn screening results for CH should not preclude appropriate evaluation of infants presenting with clinical signs and symptoms suggestive of hypothyroidism.

### **Timing of Screening**

Infants should be tested between 2 and 4 days of age. Infants discharged from hospitals before 48 hours of life should be tested immediately before discharge. Specimens obtained in the first 24-48 hours of age may be falsely elevated for TSH regardless of the screening method used.

### **Treatment**

Primary care clinicians should ensure that infants with abnormal screens receive confirmatory testing and begin appropriate treatment with thyroid hormone replacement within 2 weeks after birth. Children with positive confirmatory testing in whom no permanent cause of CH is found (such as lack of thyroid tissue on thyroid ultrasound or thyroid scan), should, at some time point after the age of 3 years, undergo a 30-day trial of reduced or discontinued thyroid hormone replacement therapy to determine if the hypothyroidism is permanent or transient.

## **FUTURE RESEARCH NEEDS**

Additional research is needed to determine the cost-benefit for different screening strategies, including the use of newer, more accurate TSH measurements, combined TSH-T<sub>4</sub> strategies, and methods designed to identify both primary and central hypothyroidism. Future research should be directed to determining the incremental benefits of routine collection of a second specimen from two week olds. Additional research is also needed on how to ameliorate the affects of false positive results from CH and other newborn screening tests on families, such as improved communication plans for informing

parents, better newborn screening informational materials, and reduced time to rule out congenital disorders.

### DISCUSSION

In 1996, the USPSTF reviewed the evidence for screening for CH in newborns and recommended screening.<sup>3</sup> In 2006, the USPSTF performed a brief literature review and determined the benefits of screening for CH continue to be well established. This update included a search for new and substantial evidence on the benefits and harms of screening.<sup>4</sup> The USPSTF found no new substantial evidence on the benefits and harms of screening for CH and therefore, reaffirms its recommendation that all newborns be screened for CH. The 1996 recommendation statement, the 1996 evidence report, and the summary of the updated literature search can be found at <http://www.preventiveservices.ahrq.gov>.

### RECOMMENDATIONS FROM OTHER GROUPS

The American Academy of Pediatrics (AAP) and the American Academy of Family Physicians recommend universal newborn screening for congenital hypothyroidism.<sup>2,5</sup> The AAP, in conjunction with the American Thyroid Association and the Lawson Wilkins Pediatric Endocrine Society, recently published guidelines for screening and treatment for congenital hypothyroidism.<sup>2</sup>

**Members of the U.S. Preventive Services Task Force\*** are Ned Calonge, MD, MPH, Chair, USPSTF (Chief Medical Officer and State Epidemiologist, Colorado Department of Public Health and Environment, Denver, CO); Diana B. Petitti, MD, MPH, Vice-chair, USPSTF (Department of Preventive Medicine, Keck School of Medicine, University of Southern California, Sierra Madre, CA); Thomas G. DeWitt, MD (Carl Wehl Professor of Pediatrics and Director of the Division of General and Community Pediatrics, Department of Pediatrics, Children's Hospital Medical Center, Cincinnati, OH); Leon Gordis, MD, MPH, DrPH (Professor, Epidemiology Department, Johns Hopkins Bloomberg School of Public Health, Baltimore, MD); Kimberly D. Gregory, MD, MPH (Director, Women's Health Services Research and Maternal-Fetal Medicine, Department of Obstetrics and Gynecology, Cedars-Sinai Medical Center, Los Angeles, CA); Russell Harris, MD, MPH (Professor of Medicine, Sheps Center for Health Services Research, University of North Carolina School of Medicine, Chapel Hill, NC); George Isham, MD, MS, (Medical Director and Chief Health Officer, HealthPartners, Inc., Minneapolis, MN); Michael L. LeFevre, MD, MSPH (Professor, Department of Family and Community Medicine, University of Missouri School of Medicine, Columbia, MO); Carol Loveland-Cherry, PhD, RN (Executive Associate Dean, Office of Academic Affairs, University of Michigan School of Nursing, Ann Arbor, MI); Lucy N. Marion, PhD, RN (Dean and Professor, School of Nursing, Medical College of Georgia, Augusta, GA); Virginia A. Moyer, MD, MPH (Professor, Department of Pediatrics, University of Texas Health Science Center, Houston, TX); Judith K. Ockene, PhD (Professor of Medicine and Chief of Division of Preventive and Behavioral Medicine, University of Massachusetts Medical School, Worcester, MA); George F. Sawaya, MD (Associate Professor, Department of Obstetrics, Gynecology, and Reproductive Sciences and Department of Epidemiology and Biostatistics, University of California, San Francisco, CA); Albert L. Siu, MD, MSPH (Professor and Chairman, Brookdale Department of Geriatrics and Adult Development, Mount Sinai Medical Center, New York, NY); Steven M. Teutsch, MD, MPH (Executive Director, Outcomes Research and Management, Merck & Company, Inc, West Point, PA); and Barbara P. Yawn, MD, MSPH, MSc (Director of Research, Olmstead Medical Center, Rochester, MN).

---

\* Members of the Task Force at the time this recommendation was finalized. For a list of current Task Force members, go to [www.ahrq.gov/clinic/uspstfab.htm](http://www.ahrq.gov/clinic/uspstfab.htm).

### References

1. National Newborn Screening Information System. <http://www2.uthscsa.edu/nnsis/>. Accessed Oct 30 2006.
2. American Academy of Pediatrics. Update of newborn screening and therapy for congenital hypothyroidism *Pediatrics*. 2006;117(6):2290-303.
3. US Preventive Services Task Force. *Screening for Congenital Hypothyroidism. Guide to Clinical Preventive Services*. 2nd ed. Alexandria, VA: International Medical Publishing; 1996:503-507.
4. Meyers D, Haering S. *Screening for Congenital Hypothyroidism: A Literature Update for the US Preventive Services Task Force*. AHRQ Publication No. 08-05109-EF-1. Rockville, MD: Agency for Healthcare Research and Quality, 2008. <http://www.ahrq.gov/clinic/uspstf/uspsscghy.htm>.
5. American Academy of Family Physicians. Policy statement on newborn screening. *Issue Brief*. 2006;2006(Oct 5):1-12.
